# Supplementary material
Source: PubMed Central journal article supplement (PMC3193474)
Supplement: cr201153x6.pdf [file cr201153x6.pdf]

## Supplementary information, Figure S6

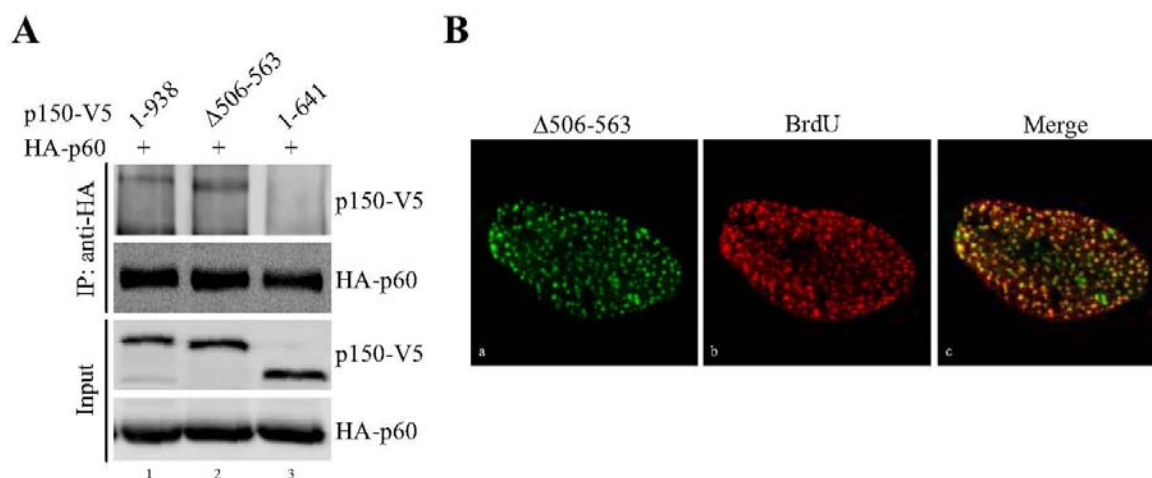

**Figure S6** The p150 mutant lacking aa 506-563 forms a complex with HA-p60 and is localized to cellular DNA replication foci. **(A)** p150 without aa 506-563 binds to p60. U2OS cells were transiently transfected with expression plasmids of HA-p60 and the C-terminally V5-tagged full-length p150 (lane 1), p150 missing aa 506 to 563 ( $\Delta$ 506-563) (lane 2) or p150 containing aa 1 to 641 (lane 3), followed by immunoprecipitation with anti-HA antibody to pull down HA-p60 and its associated p150 derivatives, which were visualized by western analysis with V5 or HA antibody. The HA antibody pulls down HA-p60 and the full-length p150 (lane 1) as well as p150 ( $\Delta$ 506-563) (lane 2). In contrast, the mutant p150 missing the p60-binding region fails to interact with p60 (lane 3). **(B)** p150 lacking aa 506 to 563 still localizes to BrdU-positive cellular DNA replication foci. U2OS cells transfected with the plasmid encoding the V5-tagged p150 mutant without aa 506-563 ( $\Delta$ 506-563-V5) were doubly stained with anti-V5 and -BrdU antibodies. All shown images represent the phenomenon occurring in more than 90% of the population.
