# Supplementary material
Source: PubMed Central journal article supplement (PMC3193474)
Supplement: cr201153x7.pdf [file cr201153x7.pdf]

## Supplementary information, Figure S7

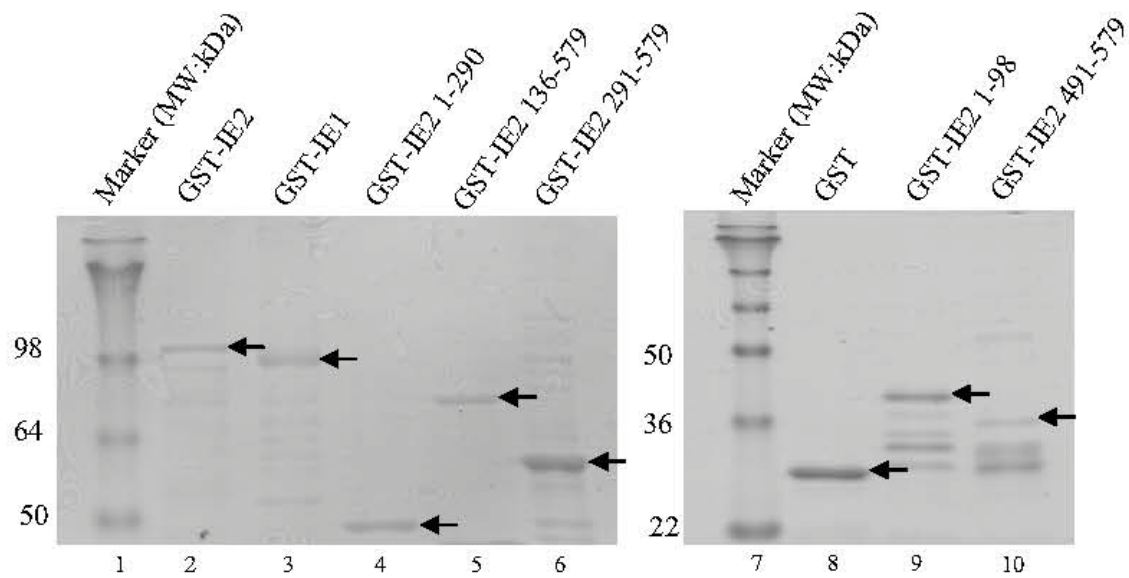

**Figure S7** GST-IE1 and GST-IE2 derivatives used in Figures 6A and 7A are shown by coomassie blue staining. The molecular weight marker is indicated in lane 1. The arrowheads point to the expected position of the band corresponding to each protein.
